# Supplementary material for: Suppression of Glomerulonephritis in NZB/NZW Lupus Prone Mice by Adoptive Transfer of Ex Vivo Expanded Regulatory T Cells
Source: PLoS One. 2009 Jun 24;4(6):e6031. doi: 10.1371/journal.pone.0006031 (PMC2696596; doi:10.1371/journal.pone.0006031)
Supplement: Dataset S2 — Serial proteinuria in renal histology mice. Mice were sacrificed 8-weeks after adoptive transfer of CD4+CD25+Tregs or PBS. Proteinuria score is recorded as 0–4 as measured by urine dipstick. (0.02 MB XLS) [file pone.0006031.s002.xls]

## Sheet: Histology Mice
Age (weeks)	28	29	30	31	32	33	34	35	36	37
Treatment
Week	-1	0	1	2	3	4	5	6	7	8
CD25 All	1	0	0	0	1	1	1	1	2	4
Treg	0	0	1	0	0	1	0	0	0	0
Treatment	0	0	0	1	1	1	1	1	0	1
Cohort	1	1	1	0	0	0	1	1	2	3
	0	1	1	1	1	1	1	1	0	1
	0	0	0	1	1	2	4	4	4	4
PBS	1	0	0	1	1	1	4	3	4	4
Treatment	0	0	1	2	3	4	4	4	4	4
Cohort	0	0	0	0	1	0	0	1	0	1
	1	0	2	2	4	3	4	4	4	4
